# Supplementary material
Source: publisher figshare collection journal article supplement (https://acs.figshare.com/ndownloader/files/4053007)
Supplement: Supplementary file 1 [file 4053007]

#The chemical, crystallographic and experimental data

data_silvia-pt-07
 
_audit_creation_method            SHELXL-97
_chemical_name_systematic

;
 ?
;

_chemical_name_common             ?
_chemical_melting_point           ?
_chemical_formula_moiety          cis-[PtCl~2~(E-N(H)=C(SEt)Me)~2~]
_chemical_formula_sum
 'C8 H18 Cl2 N2 Pt S2'
_chemical_formula_weight          472.35
 
loop_
 _atom_type_symbol
 _atom_type_description
 _atom_type_scat_dispersion_real
 _atom_type_scat_dispersion_imag
 _atom_type_scat_source
 'C'  'C'   0.0033   0.0016
 'International Tables Vol C Tables 4.2.6.8 and 6.1.1.4'
 'H'  'H'   0.0000   0.0000
 'International Tables Vol C Tables 4.2.6.8 and 6.1.1.4'
 'N'  'N'   0.0061   0.0033
 'International Tables Vol C Tables 4.2.6.8 and 6.1.1.4'
 'S'  'S'   0.1246   0.1234
 'International Tables Vol C Tables 4.2.6.8 and 6.1.1.4'
 'Cl'  'Cl'   0.1484   0.1585
 'International Tables Vol C Tables 4.2.6.8 and 6.1.1.4'
 'Pt'  'Pt'  -1.7033   8.3905
 'International Tables Vol C Tables 4.2.6.8 and 6.1.1.4'
 
_symmetry_cell_setting            triclinic
_symmetry_space_group_name_H-M    P-1
 
loop_
 _symmetry_equiv_pos_as_xyz
 'x, y, z'
 '-x, -y, -z'
 
_cell_length_a                    8.797(2)
_cell_length_b                    9.277(2)
_cell_length_c                    10.069(2)
_cell_angle_alpha                 106.68(2)
_cell_angle_beta                  104.19(2)
_cell_angle_gamma                 93.56(2)
_cell_volume                      755.3(3)
_cell_formula_units_Z             2
_cell_measurement_temperature     293(2)
_cell_measurement_reflns_used     ?
_cell_measurement_theta_min       ?
_cell_measurement_theta_max       ?
 
_exptl_crystal_description        prism 
_exptl_crystal_colour             pale-yellow
_exptl_crystal_size_max           0.32
_exptl_crystal_size_mid           0.20
_exptl_crystal_size_min           0.16
_exptl_crystal_density_meas       ?
_exptl_crystal_density_diffrn     2.077
_exptl_crystal_density_method     'not measured'
_exptl_crystal_F_000              448
_exptl_absorpt_coefficient_mu     9.893
_exptl_absorpt_correction_type    psi-scan
_exptl_absorpt_correction_T_min   0.7070
_exptl_absorpt_correction_T_max   0.9170
_exptl_absorpt_process_details    '(North et al., 1968)'
 
_exptl_special_details
;
 ?
;
 
 
_diffrn_ambient_temperature       293(2)
_diffrn_radiation_wavelength      0.71069
_diffrn_radiation_type            MoK\a
_diffrn_radiation_source          'fine-focus sealed tube'
_diffrn_radiation_monochromator   graphite
_diffrn_measurement_device_type   'Philips PW1100'
_diffrn_measurement_method        \Q/2\Q
_diffrn_detector_area_resol_mean  ?
_diffrn_standards_number          ?
_diffrn_standards_interval_count  ?
_diffrn_standards_interval_time   ?
_diffrn_standards_decay_%         ?
_diffrn_reflns_number             3729
_diffrn_reflns_av_R_equivalents   0.0134
_diffrn_reflns_av_sigmaI/netI     0.0200
_diffrn_reflns_limit_h_min        -11
_diffrn_reflns_limit_h_max        11
_diffrn_reflns_limit_k_min        -12
_diffrn_reflns_limit_k_max        11
_diffrn_reflns_limit_l_min        0
_diffrn_reflns_limit_l_max        13
_diffrn_reflns_theta_min          3.10
_diffrn_reflns_theta_max          28.00
_reflns_number_total              3531
_reflns_number_gt                 3500
_reflns_threshold_expression      >2sigma(I)
 
_computing_data_collection        ?
_computing_cell_refinement        ?
_computing_data_reduction         ?
_computing_structure_solution     'SIR97 (Altomare et al. 1999)'
_computing_structure_refinement   'SHELXL-97 (Sheldrick, 1997)'
_computing_molecular_graphics     ?
_computing_publication_material   ?
 
_refine_special_details
;
 Refinement of F^2^ against ALL reflections.  The weighted R-factor wR and
 goodness of fit S are based on F^2^, conventional R-factors R are based
 on F, with F set to zero for negative F^2^. The threshold expression of
 F^2^ > 2sigma(F^2^) is used only for calculating R-factors(gt) etc. and is
 not relevant to the choice of reflections for refinement.  R-factors based
 on F^2^ are statistically about twice as large as those based on F, and R-
 factors based on ALL data will be even larger.
;
 
_refine_ls_structure_factor_coef  Fsqd
_refine_ls_matrix_type            full
_refine_ls_weighting_scheme       calc
_refine_ls_weighting_details
 'calc w=1/[\s^2^(Fo^2^)+(0.0000P)^2^+2.7535P] where P=(Fo^2^+2Fc^2^)/3'
_atom_sites_solution_primary      direct
_atom_sites_solution_secondary    difmap
_atom_sites_solution_hydrogens    geom
_refine_ls_hydrogen_treatment     constr
_refine_ls_extinction_method      SHELXL
_refine_ls_extinction_coef        0.0068(4)
_refine_ls_extinction_expression
 'Fc^*^=kFc[1+0.001xFc^2^\l^3^/sin(2\q)]^-1/4^'
_refine_ls_number_reflns          3531
_refine_ls_number_parameters      141
_refine_ls_number_restraints      0
_refine_ls_R_factor_all           0.0256
_refine_ls_R_factor_gt            0.0251
_refine_ls_wR_factor_ref          0.0612
_refine_ls_wR_factor_gt           0.0605
_refine_ls_goodness_of_fit_ref    1.202
_refine_ls_restrained_S_all       1.202
_refine_ls_shift/su_max           0.013
_refine_ls_shift/su_mean          0.000
 
loop_
 _atom_site_label
 _atom_site_type_symbol
 _atom_site_fract_x
 _atom_site_fract_y
 _atom_site_fract_z
 _atom_site_U_iso_or_equiv
 _atom_site_adp_type
 _atom_site_occupancy
 _atom_site_symmetry_multiplicity
 _atom_site_calc_flag
 _atom_site_refinement_flags
 _atom_site_disorder_assembly
 _atom_site_disorder_group
Pt Pt 0.46950(2) 0.179926(19) 0.495358(19) 0.03704(8) Uani 1 1 d . . .
Cl1 Cl 0.68039(18) 0.24293(18) 0.41431(19) 0.0609(4) Uani 1 1 d . . .
Cl2 Cl 0.30943(19) 0.08021(15) 0.26222(13) 0.0531(3) Uani 1 1 d . . .
S1 S 0.03509(19) 0.17013(18) 0.67763(17) 0.0557(3) Uani 1 1 d . . .
S2 S 0.7468(2) 0.45383(17) 0.96607(18) 0.0714(5) Uani 1 1 d . . .
N1 N 0.2895(5) 0.1330(5) 0.5747(4) 0.0403(8) Uani 1 1 d . . .
H1 H 0.2913 0.0534 0.6023 0.048 Uiso 1 1 calc R . .
N2 N 0.6064(5) 0.2599(5) 0.7000(5) 0.0446(9) Uani 1 1 d . . .
H2 H 0.6528 0.1937 0.7334 0.054 Uiso 1 1 calc R . .
C1 C 0.1731(6) 0.2062(5) 0.5893(5) 0.0401(10) Uani 1 1 d . . .
C2 C 0.1412(7) 0.3340(7) 0.5271(7) 0.0546(13) Uani 1 1 d . . .
H2A H 0.2008 0.4275 0.5950 0.066 Uiso 1 1 calc R . .
H2B H 0.0303 0.3423 0.5073 0.066 Uiso 1 1 calc R . .
H2C H 0.1723 0.3138 0.4393 0.066 Uiso 1 1 calc R . .
C3 C 0.1186(9) 0.0388(7) 0.7668(8) 0.0665(17) Uani 1 1 d . . .
H3A H 0.0388 -0.0026 0.8027 0.080 Uiso 1 1 calc R . .
H3B H 0.1440 -0.0450 0.6962 0.080 Uiso 1 1 calc R . .
C4 C 0.2641(12) 0.1052(10) 0.8893(8) 0.093(3) Uani 1 1 d . . .
H4A H 0.3431 0.1494 0.8559 0.112 Uiso 1 1 calc R . .
H4B H 0.3042 0.0267 0.9267 0.112 Uiso 1 1 calc R . .
H4C H 0.2385 0.1823 0.9640 0.112 Uiso 1 1 calc R . .
C5 C 0.6344(7) 0.3955(6) 0.7875(7) 0.0527(13) Uani 1 1 d . . .
C6 C 0.5696(10) 0.5216(7) 0.7391(8) 0.088(3) Uani 1 1 d . . .
H6A H 0.5445 0.4936 0.6359 0.106 Uiso 1 1 calc R . .
H6B H 0.6469 0.6114 0.7811 0.106 Uiso 1 1 calc R . .
H6C H 0.4753 0.5415 0.7691 0.106 Uiso 1 1 calc R . .
C7 C 0.8280(10) 0.2878(7) 0.9946(7) 0.0720(19) Uani 1 1 d . . .
H7A H 0.7430 0.2062 0.9744 0.086 Uiso 1 1 calc R . .
H7B H 0.8934 0.2535 0.9301 0.086 Uiso 1 1 calc R . .
C8 C 0.9257(10) 0.3278(9) 1.1483(8) 0.080(2) Uani 1 1 d . . .
H8A H 1.0018 0.4161 1.1707 0.096 Uiso 1 1 calc R . .
H8B H 0.9799 0.2442 1.1616 0.096 Uiso 1 1 calc R . .
H8C H 0.8579 0.3489 1.2110 0.096 Uiso 1 1 calc R . .
 
loop_
 _atom_site_aniso_label
 _atom_site_aniso_U_11
 _atom_site_aniso_U_22
 _atom_site_aniso_U_33
 _atom_site_aniso_U_23
 _atom_site_aniso_U_13
 _atom_site_aniso_U_12
Pt 0.04427(12) 0.03114(10) 0.04049(11) 0.01665(7) 0.01266(7) 0.01000(7)
Cl1 0.0570(8) 0.0658(9) 0.0848(10) 0.0444(8) 0.0361(7) 0.0223(7)
Cl2 0.0754(9) 0.0425(6) 0.0384(6) 0.0132(5) 0.0096(6) 0.0078(6)
S1 0.0582(8) 0.0568(8) 0.0603(8) 0.0193(7) 0.0287(7) 0.0117(6)
S2 0.0905(12) 0.0414(7) 0.0584(9) 0.0082(6) -0.0138(8) 0.0087(7)
N1 0.045(2) 0.0364(19) 0.044(2) 0.0174(17) 0.0141(17) 0.0066(16)
N2 0.052(2) 0.035(2) 0.046(2) 0.0166(17) 0.0072(19) 0.0101(17)
C1 0.044(2) 0.038(2) 0.035(2) 0.0076(18) 0.0102(19) 0.0037(19)
C2 0.054(3) 0.050(3) 0.067(4) 0.026(3) 0.019(3) 0.017(2)
C3 0.093(5) 0.053(3) 0.074(4) 0.031(3) 0.046(4) 0.017(3)
C4 0.147(8) 0.083(5) 0.053(4) 0.034(4) 0.016(5) 0.027(5)
C5 0.054(3) 0.039(3) 0.061(3) 0.018(2) 0.004(3) 0.005(2)
C6 0.113(6) 0.035(3) 0.080(5) 0.014(3) -0.034(4) 0.009(3)
C7 0.104(5) 0.052(3) 0.052(3) 0.017(3) 0.003(3) 0.019(3)
C8 0.107(6) 0.067(4) 0.059(4) 0.025(3) 0.001(4) 0.012(4)
 
_geom_special_details
;
 All esds (except the esd in the dihedral angle between two l.s. planes)
 are estimated using the full covariance matrix.  The cell esds are taken
 into account individually in the estimation of esds in distances, angles
 and torsion angles; correlations between esds in cell parameters are only
 used when they are defined by crystal symmetry.  An approximate (isotropic)
 treatment of cell esds is used for estimating esds involving l.s. planes.
;
 
loop_
 _geom_bond_atom_site_label_1
 _geom_bond_atom_site_label_2
 _geom_bond_distance
 _geom_bond_site_symmetry_2
 _geom_bond_publ_flag
Pt N2 2.010(4) . ?
Pt N1 2.017(4) . ?
Pt Cl2 2.3065(15) . ?
Pt Cl1 2.3089(15) . ?
S1 C1 1.739(5) . ?
S1 C3 1.802(7) . ?
S2 C5 1.734(6) . ?
S2 C7 1.804(7) . ?
N1 C1 1.279(6) . ?
N2 C5 1.280(7) . ?
C1 C2 1.502(7) . ?
C3 C4 1.494(11) . ?
C5 C6 1.485(8) . ?
C7 C8 1.500(9) . ?
 
loop_
 _geom_angle_atom_site_label_1
 _geom_angle_atom_site_label_2
 _geom_angle_atom_site_label_3
 _geom_angle
 _geom_angle_site_symmetry_1
 _geom_angle_site_symmetry_3
 _geom_angle_publ_flag
N2 Pt N1 87.56(17) . . ?
N2 Pt Cl2 177.92(12) . . ?
N1 Pt Cl2 91.10(12) . . ?
N2 Pt Cl1 90.12(14) . . ?
N1 Pt Cl1 177.33(12) . . ?
Cl2 Pt Cl1 91.25(6) . . ?
C1 S1 C3 103.7(3) . . ?
C5 S2 C7 105.3(3) . . ?
C1 N1 Pt 128.4(3) . . ?
C5 N2 Pt 129.2(4) . . ?
N1 C1 C2 121.8(5) . . ?
N1 C1 S1 125.3(4) . . ?
C2 C1 S1 112.9(4) . . ?
C4 C3 S1 114.9(5) . . ?
N2 C5 C6 120.4(5) . . ?
N2 C5 S2 126.3(4) . . ?
C6 C5 S2 113.3(4) . . ?
C8 C7 S2 108.8(5) . . ?
 
_diffrn_measured_fraction_theta_max    0.966
_diffrn_reflns_theta_full              28.00
_diffrn_measured_fraction_theta_full   0.968
_refine_diff_density_max    0.804
_refine_diff_density_min   -0.763
_refine_diff_density_rms    0.108

#=== END
 
data_PtBz-cis-(2)
 
_audit_creation_method            SHELXL-97
_chemical_name_systematic
;
 ?
;
_chemical_name_common             ?
_chemical_melting_point           ?
_chemical_formula_moiety          cis-[PtCl~2~(E-N(H)=C(SEt)Et)~2~
_chemical_formula_sum
 'C10 H22 Cl2 N2 Pt S2'
_chemical_formula_weight          500.41
 
loop_
 _atom_type_symbol
 _atom_type_description
 _atom_type_scat_dispersion_real
 _atom_type_scat_dispersion_imag
 _atom_type_scat_source
 'C'  'C'   0.0033   0.0016
 'International Tables Vol C Tables 4.2.6.8 and 6.1.1.4'
 'H'  'H'   0.0000   0.0000
 'International Tables Vol C Tables 4.2.6.8 and 6.1.1.4'
 'N'  'N'   0.0061   0.0033
 'International Tables Vol C Tables 4.2.6.8 and 6.1.1.4'
 'S'  'S'   0.1246   0.1234
 'International Tables Vol C Tables 4.2.6.8 and 6.1.1.4'
 'Cl'  'Cl'   0.1484   0.1585
 'International Tables Vol C Tables 4.2.6.8 and 6.1.1.4'
 'Pt'  'Pt'  -1.7033   8.3905
 'International Tables Vol C Tables 4.2.6.8 and 6.1.1.4'
 
_symmetry_cell_setting            monoclinic 
_symmetry_space_group_name_H-M    P21/n
 
loop_
 _symmetry_equiv_pos_as_xyz
 'x, y, z'
 '-x+1/2, y+1/2, -z+1/2'
 '-x, -y, -z'
 'x-1/2, -y-1/2, z-1/2'
 
_cell_length_a                    12.989(3)
_cell_length_b                    14.486(3)
_cell_length_c                    18.594(3)
_cell_angle_alpha                 90.00
_cell_angle_beta                  94.17(3)
_cell_angle_gamma                 90.00
_cell_volume                      3489.4(12)
_cell_formula_units_Z             8
_cell_measurement_temperature     293(2)
_cell_measurement_reflns_used     ?
_cell_measurement_theta_min       ?
_cell_measurement_theta_max       ?
 
_exptl_crystal_description        prism
_exptl_crystal_colour             pale-yellow
_exptl_crystal_size_max           0.24
_exptl_crystal_size_mid           0.20
_exptl_crystal_size_min           0.18
_exptl_crystal_density_meas       ?
_exptl_crystal_density_diffrn     1.905
_exptl_crystal_density_method     'not measured'
_exptl_crystal_F_000              1920
_exptl_absorpt_coefficient_mu     8.572
_exptl_absorpt_correction_type    psi-scan
_exptl_absorpt_correction_T_min   0.3920
_exptl_absorpt_correction_T_max   0.7910
_exptl_absorpt_process_details  
 'A. T. C. North, et al. Acta Cryst., A24 (1968) 351'
 
 
_exptl_special_details
;
 ?
;
 
_diffrn_ambient_temperature       293(2)
_diffrn_radiation_wavelength      0.71073
_diffrn_radiation_type            MoK\a
_diffrn_radiation_source          'fine-focus sealed tube'
_diffrn_radiation_monochromator   graphite
_diffrn_measurement_device_type   ?
_diffrn_measurement_method        ?
_diffrn_detector_area_resol_mean  ?
_diffrn_standards_number          ?
_diffrn_standards_interval_count  ?
_diffrn_standards_interval_time   ?
_diffrn_standards_decay_%         ?
_diffrn_reflns_number             6415
_diffrn_reflns_av_R_equivalents   0.0270
_diffrn_reflns_av_sigmaI/netI     0.0363
_diffrn_reflns_limit_h_min        -15
_diffrn_reflns_limit_h_max        15
_diffrn_reflns_limit_k_min        0
_diffrn_reflns_limit_k_max        17
_diffrn_reflns_limit_l_min        0
_diffrn_reflns_limit_l_max        22
_diffrn_reflns_theta_min          3.02
_diffrn_reflns_theta_max          25.00
_reflns_number_total              6092
_reflns_number_gt                 5238
_reflns_threshold_expression      >2sigma(I)
 
_computing_data_collection        ?
_computing_cell_refinement        ?
_computing_data_reduction         ?
_computing_structure_solution     'SIR2004 (Burla et al. 2005)' 
_computing_structure_refinement   'SHELXL-97 (Sheldrick, 1997)'
_computing_molecular_graphics     ?
_computing_publication_material   ?
 
_refine_special_details
;
 Refinement of F^2^ against ALL reflections.  The weighted R-factor wR and
 goodness of fit S are based on F^2^, conventional R-factors R are based
 on F, with F set to zero for negative F^2^. The threshold expression of
 F^2^ > 2sigma(F^2^) is used only for calculating R-factors(gt) etc. and is
 not relevant to the choice of reflections for refinement.  R-factors based
 on F^2^ are statistically about twice as large as those based on F, and R-
 factors based on ALL data will be even larger.
; 
_refine_ls_structure_factor_coef  Fsqd
_refine_ls_matrix_type            full
_refine_ls_weighting_scheme       calc
_refine_ls_weighting_details
 'calc w=1/[\s^2^(Fo^2^)+(0.0000P)^2^+62.3925P] where P=(Fo^2^+2Fc^2^)/3'
_atom_sites_solution_primary      direct
_atom_sites_solution_secondary    difmap
_atom_sites_solution_hydrogens    geom
_refine_ls_hydrogen_treatment     constr
_refine_ls_extinction_method      none
_refine_ls_extinction_coef        ?
_refine_ls_number_reflns          6092
_refine_ls_number_parameters      316
_refine_ls_number_restraints      0
_refine_ls_R_factor_all           0.0819
_refine_ls_R_factor_gt            0.0632
_refine_ls_wR_factor_ref          0.1547
_refine_ls_wR_factor_gt           0.1420
_refine_ls_goodness_of_fit_ref    1.353
_refine_ls_restrained_S_all       1.353
_refine_ls_shift/su_max           0.001
_refine_ls_shift/su_mean          0.000
 
loop_
 _atom_site_label
 _atom_site_type_symbol
 _atom_site_fract_x
 _atom_site_fract_y
 _atom_site_fract_z
 _atom_site_U_iso_or_equiv
 _atom_site_adp_type
 _atom_site_occupancy
 _atom_site_symmetry_multiplicity
 _atom_site_calc_flag
 _atom_site_refinement_flags
 _atom_site_disorder_assembly
 _atom_site_disorder_group
Pt1 Pt 0.06551(4) 0.44644(4) 0.23518(3) 0.04172(19) Uani 1 1 d . . .
Pt2 Pt -0.09020(4) 0.27057(4) 0.23998(3) 0.0421(2) Uani 1 1 d . . .
Cl2 Cl -0.0631(3) 0.5514(3) 0.2039(2) 0.0569(10) Uani 1 1 d . . .
Cl1 Cl 0.0483(4) 0.4768(3) 0.3556(2) 0.0645(11) Uani 1 1 d . . .
Cl3 Cl 0.0341(3) 0.1644(3) 0.2125(3) 0.0689(12) Uani 1 1 d . . .
Cl4 Cl -0.1430(3) 0.2891(3) 0.1197(2) 0.0629(11) Uani 1 1 d . . .
S4 S -0.3681(4) 0.4442(4) 0.3055(3) 0.0723(14) Uani 1 1 d . . .
S1 S 0.1245(5) 0.4283(5) -0.0087(3) 0.0904(19) Uani 1 1 d . . .
S3 S -0.0342(8) 0.1973(6) 0.4826(3) 0.131(3) Uani 1 1 d . . .
C16 C -0.2893(12) 0.3568(11) 0.2755(9) 0.051(4) Uani 1 1 d . . .
N2 N 0.1790(10) 0.3554(9) 0.2580(7) 0.052(3) Uani 1 1 d . . .
H2 H 0.1624 0.2995 0.2469 0.063 Uiso 1 1 calc R . .
C17 C -0.3450(13) 0.2686(13) 0.2590(10) 0.063(5) Uani 1 1 d . . .
H17A H -0.3923 0.2569 0.2960 0.076 Uiso 1 1 calc R . .
H17B H -0.2955 0.2184 0.2602 0.076 Uiso 1 1 calc R . .
C11 C -0.0715(16) 0.1946(13) 0.3911(10) 0.068(5) Uani 1 1 d . . .
C18 C -0.4049(16) 0.2698(17) 0.1863(11) 0.088(7) Uani 1 1 d . . .
H18A H -0.4556 0.3181 0.1852 0.105 Uiso 1 1 calc R . .
H18B H -0.4388 0.2114 0.1780 0.105 Uiso 1 1 calc R . .
H18C H -0.3584 0.2805 0.1493 0.105 Uiso 1 1 calc R . .
N1 N 0.0738(10) 0.4162(9) 0.1299(6) 0.047(3) Uani 1 1 d . . .
H1 H 0.0324 0.3733 0.1140 0.057 Uiso 1 1 calc R . .
N4 N -0.1920(9) 0.3655(9) 0.2669(6) 0.046(3) Uani 1 1 d . . .
H4 H -0.1675 0.4202 0.2738 0.055 Uiso 1 1 calc R . .
C1 C 0.1311(15) 0.4505(14) 0.0816(11) 0.071(5) Uani 1 1 d . . .
N3 N -0.0451(10) 0.2567(10) 0.3457(7) 0.054(3) Uani 1 1 d . . .
H3 H -0.0023 0.2978 0.3630 0.065 Uiso 1 1 calc R . .
C6 C 0.2719(12) 0.3643(13) 0.2859(9) 0.057(4) Uani 1 1 d . . .
C4 C 0.0358(18) 0.3362(18) -0.0207(11) 0.087(7) Uani 1 1 d . . .
H4A H -0.0219 0.3490 0.0081 0.104 Uiso 1 1 calc R . .
H4B H 0.0093 0.3358 -0.0708 0.104 Uiso 1 1 calc R . .
C2 C 0.209(2) 0.524(2) 0.1040(14) 0.103(8) Uani 1 1 d . . .
H2A H 0.2030 0.5736 0.0685 0.123 Uiso 1 1 calc R . .
H2B H 0.1911 0.5501 0.1495 0.123 Uiso 1 1 calc R . .
C5 C 0.074(2) 0.2422(19) -0.0020(15) 0.117(10) Uani 1 1 d . . .
H5A H 0.1314 0.2278 -0.0302 0.140 Uiso 1 1 calc R . .
H5B H 0.0200 0.1982 -0.0122 0.140 Uiso 1 1 calc R . .
H5C H 0.0966 0.2398 0.0483 0.140 Uiso 1 1 calc R . .
C3 C 0.311(3) 0.497(3) 0.1115(18) 0.164(16) Uani 1 1 d . . .
H3A H 0.3237 0.4644 0.1564 0.197 Uiso 1 1 calc R . .
H3B H 0.3551 0.5497 0.1109 0.197 Uiso 1 1 calc R . .
H3C H 0.3249 0.4563 0.0724 0.197 Uiso 1 1 calc R . .
S2 S 0.3649(4) 0.2776(4) 0.2934(3) 0.0693(13) Uani 1 1 d . . .
C7 C 0.3096(14) 0.4554(12) 0.3167(10) 0.064(5) Uani 1 1 d . . .
H7A H 0.3586 0.4804 0.2850 0.077 Uiso 1 1 calc R . .
H7B H 0.2512 0.4973 0.3152 0.077 Uiso 1 1 calc R . .
C8 C 0.358(2) 0.4563(16) 0.3898(11) 0.093(7) Uani 1 1 d . . .
H8A H 0.3114 0.4308 0.4222 0.112 Uiso 1 1 calc R . .
H8B H 0.3746 0.5187 0.4036 0.112 Uiso 1 1 calc R . .
H8C H 0.4200 0.4201 0.3916 0.112 Uiso 1 1 calc R . .
C19 C -0.2836(17) 0.5329(15) 0.3361(14) 0.089(7) Uani 1 1 d . . .
H19A H -0.2327 0.5429 0.3012 0.107 Uiso 1 1 calc R . .
H19B H -0.3222 0.5897 0.3404 0.107 Uiso 1 1 calc R . .
C9 C 0.3117(14) 0.1877(13) 0.2349(12) 0.069(5) Uani 1 1 d . . .
H9A H 0.3541 0.1329 0.2419 0.083 Uiso 1 1 calc R . .
H9B H 0.2431 0.1727 0.2487 0.083 Uiso 1 1 calc R . .
C10 C 0.3049(16) 0.2127(16) 0.1564(12) 0.084(6) Uani 1 1 d . . .
H10A H 0.2546 0.2608 0.1476 0.100 Uiso 1 1 calc R . .
H10B H 0.2847 0.1594 0.1281 0.100 Uiso 1 1 calc R . .
H10C H 0.3710 0.2340 0.1434 0.100 Uiso 1 1 calc R . .
C12 C -0.141(2) 0.1159(16) 0.3673(13) 0.100(8) Uani 1 1 d . . .
H12A H -0.2102 0.1311 0.3789 0.120 Uiso 1 1 calc R . .
H12B H -0.1412 0.1112 0.3153 0.120 Uiso 1 1 calc R . .
C13 C -0.116(2) 0.0272(19) 0.3970(18) 0.134(11) Uani 1 1 d . . .
H13A H -0.0854 -0.0102 0.3614 0.201 Uiso 1 1 calc R . .
H13B H -0.1771 -0.0020 0.4114 0.201 Uiso 1 1 calc R . .
H13C H -0.0672 0.0340 0.4382 0.201 Uiso 1 1 calc R . .
C14 C 0.046(3) 0.294(2) 0.4920(13) 0.113(8) Uani 1 1 d . . .
H14A H 0.0177 0.3435 0.4617 0.156 Uiso 1 1 calc R . .
H14B H 0.0506 0.3146 0.5417 0.156 Uiso 1 1 calc R . .
C20 C -0.228(2) 0.509(2) 0.4095(18) 0.152(15) Uani 1 1 d . . .
H20A H -0.2779 0.4862 0.4412 0.182 Uiso 1 1 calc R . .
H20B H -0.1954 0.5629 0.4301 0.182 Uiso 1 1 calc R . .
H20C H -0.1775 0.4620 0.4032 0.182 Uiso 1 1 calc R . .
C15 C 0.149(3) 0.267(3) 0.4702(18) 0.157(13) Uani 1 1 d . . .
H15A H 0.1729 0.2133 0.4966 0.228 Uiso 1 1 calc R . .
H15B H 0.1968 0.3171 0.4806 0.228 Uiso 1 1 calc R . .
H15C H 0.1453 0.2542 0.4195 0.228 Uiso 1 1 calc R . .
 
loop_
 _atom_site_aniso_label
 _atom_site_aniso_U_11
 _atom_site_aniso_U_22
 _atom_site_aniso_U_33
 _atom_site_aniso_U_23
 _atom_site_aniso_U_13
 _atom_site_aniso_U_12
Pt1 0.0418(3) 0.0392(3) 0.0441(3) 0.0017(3) 0.0030(2) -0.0008(2)
Pt2 0.0407(3) 0.0439(3) 0.0418(3) -0.0012(3) 0.0034(2) -0.0031(2)
Cl2 0.056(2) 0.052(2) 0.063(3) 0.006(2) 0.0057(19) 0.0099(18)
Cl1 0.084(3) 0.066(3) 0.044(2) -0.002(2) 0.008(2) -0.003(2)
Cl3 0.050(2) 0.059(3) 0.098(4) -0.015(3) 0.012(2) 0.005(2)
Cl4 0.058(2) 0.082(3) 0.048(2) 0.002(2) -0.0023(19) -0.013(2)
S4 0.053(3) 0.072(3) 0.092(4) -0.015(3) 0.010(2) 0.008(2)
S1 0.101(4) 0.120(5) 0.054(3) -0.012(3) 0.030(3) -0.018(4)
S3 0.186(8) 0.149(7) 0.055(4) 0.034(4) -0.018(4) -0.054(6)
C16 0.051(9) 0.053(10) 0.049(9) -0.001(8) 0.009(7) 0.019(7)
N2 0.062(8) 0.038(7) 0.056(8) -0.001(6) -0.006(7) 0.002(6)
C17 0.050(9) 0.067(11) 0.073(12) -0.002(10) 0.012(9) -0.011(9)
C11 0.090(14) 0.062(11) 0.051(10) 0.030(9) -0.007(9) -0.026(10)
C18 0.071(13) 0.118(19) 0.073(14) -0.027(13) 0.001(11) -0.038(13)
N1 0.050(7) 0.054(8) 0.037(7) 0.000(6) 0.000(6) 0.009(6)
N4 0.041(7) 0.052(8) 0.045(7) -0.011(6) 0.010(6) -0.003(6)
C1 0.069(12) 0.073(13) 0.076(13) -0.004(10) 0.031(10) -0.017(10)
N3 0.058(8) 0.060(9) 0.044(8) 0.010(7) 0.000(6) -0.002(7)
C6 0.041(8) 0.072(12) 0.057(10) 0.000(9) 0.003(7) -0.005(8)
C4 0.102(16) 0.116(19) 0.044(11) -0.021(12) 0.017(11) -0.026(15)
C2 0.096(18) 0.13(2) 0.082(16) 0.001(16) 0.033(14) -0.021(17)
C5 0.15(3) 0.09(2) 0.10(2) -0.033(16) -0.008(18) -0.018(18)
C3 0.15(3) 0.23(4) 0.12(3) -0.02(3) -0.01(2) -0.06(3)
S2 0.052(2) 0.073(3) 0.081(3) 0.002(3) -0.007(2) 0.012(2)
C7 0.054(10) 0.059(11) 0.076(13) 0.012(9) -0.024(9) 0.008(8)
C8 0.13(2) 0.089(16) 0.055(12) -0.024(12) 0.000(13) -0.014(15)
C19 0.077(14) 0.073(14) 0.12(2) -0.035(14) 0.022(14) -0.010(11)
C9 0.048(10) 0.057(11) 0.103(16) 0.009(11) 0.005(10) 0.007(8)
C10 0.075(13) 0.083(15) 0.096(17) 0.000(13) 0.024(12) 0.018(11)
C12 0.14(2) 0.071(15) 0.083(16) 0.025(13) -0.022(15) -0.026(15)
C13 0.14(3) 0.09(2) 0.16(3) 0.00(2) -0.01(2) -0.024(19)
C14 0.17(2) 0.13(2) 0.035(11) 0.014(13) -0.013(13) -0.049(19) 
C20 0.11(2) 0.18(3) 0.16(3) -0.10(3) 0.01(2) -0.06(2)
C15 0.159(17) 0.159(18) 0.148(17) 0.014(13) -0.017(12) -0.016(13)  
 
_geom_special_details
;
 All esds (except the esd in the dihedral angle between two l.s. planes)
 are estimated using the full covariance matrix.  The cell esds are taken
 into account individually in the estimation of esds in distances, angles
 and torsion angles; correlations between esds in cell parameters are only
 used when they are defined by crystal symmetry.  An approximate (isotropic)
 treatment of cell esds is used for estimating esds involving l.s. planes.
;
 
loop_
 _geom_bond_atom_site_label_1
 _geom_bond_atom_site_label_2
 _geom_bond_distance
 _geom_bond_site_symmetry_2
 _geom_bond_publ_flag
Pt1 N2 2.000(13) . ?
Pt1 N1 2.017(12) . ?
Pt1 Cl2 2.302(4) . ?
Pt1 Cl1 2.309(4) . ?
Pt2 N4 1.997(12) . ?
Pt2 N3 2.020(13) . ?
Pt2 Cl4 2.307(4) . ?
Pt2 Cl3 2.314(4) . ?
S4 C16 1.746(15) . ?
S4 C19 1.76(2) . ?
S1 C1 1.70(2) . ?
S1 C4 1.77(2) . ?
S3 C11 1.736(19) . ?
S3 C14 1.74(3) . ?
C16 N4 1.290(19) . ?
C16 C17 1.49(2) . ?
N2 C6 1.285(19) . ?
C17 C18 1.51(3) . ?
C11 N3 1.30(2) . ?
C11 C12 1.50(3) . ?
N1 C1 1.31(2) . ?
C1 C2 1.51(3) . ?
C6 C7 1.51(2) . ?
C6 S2 1.740(18) . ?
C4 C5 1.48(3) . ?
C2 C3 1.38(4) . ?
S2 C9 1.80(2) . ?
C7 C8 1.46(3) . ?
C19 C20 1.53(4) . ?
C9 C10 1.50(3) . ?
C12 C13 1.43(3) . ?
C14 C15 1.48(5) . ?
 
loop_
 _geom_angle_atom_site_label_1
 _geom_angle_atom_site_label_2
 _geom_angle_atom_site_label_3
 _geom_angle
 _geom_angle_site_symmetry_1
 _geom_angle_site_symmetry_3
 _geom_angle_publ_flag
N2 Pt1 N1 88.4(5) . . ?
N2 Pt1 Cl2 177.5(4) . . ?
N1 Pt1 Cl2 89.2(4) . . ?
N2 Pt1 Cl1 92.4(4) . . ?
N1 Pt1 Cl1 177.1(4) . . ?
Cl2 Pt1 Cl1 89.99(17) . . ?
N4 Pt2 N3 88.6(5) . . ?
N4 Pt2 Cl4 90.4(4) . . ?
N3 Pt2 Cl4 178.9(4) . . ?
N4 Pt2 Cl3 177.1(4) . . ?
N3 Pt2 Cl3 89.5(4) . . ?
Cl4 Pt2 Cl3 91.50(19) . . ?
C16 S4 C19 105.5(9) . . ?
C1 S1 C4 104.6(9) . . ?
C11 S3 C14 103.8(10) . . ?
N4 C16 C17 121.6(14) . . ?
N4 C16 S4 124.8(13) . . ?
C17 C16 S4 113.6(12) . . ?
C6 N2 Pt1 132.5(12) . . ?
C16 C17 C18 112.7(16) . . ?
N3 C11 C12 121.2(17) . . ?
N3 C11 S3 123.7(14) . . ?
C12 C11 S3 115.1(13) . . ?
C1 N1 Pt1 131.2(13) . . ?
C16 N4 Pt2 129.5(11) . . ?
N1 C1 C2 119.0(18) . . ?
N1 C1 S1 127.9(15) . . ?
C2 C1 S1 112.9(14) . . ?
C11 N3 Pt2 129.1(13) . . ?
N2 C6 C7 120.7(16) . . ?
N2 C6 S2 125.9(14) . . ?
C7 C6 S2 113.4(11) . . ?
C5 C4 S1 117.3(19) . . ?
C3 C2 C1 116(3) . . ?
C6 S2 C9 103.8(8) . . ?
C8 C7 C6 118.0(16) . . ?
C20 C19 S4 111.2(19) . . ?
C10 C9 S2 113.9(15) . . ?
C13 C12 C11 117(2) . . ?
C15 C14 S3 108(3) . . ?
 
_diffrn_measured_fraction_theta_max    0.992
_diffrn_reflns_theta_full              25.00
_diffrn_measured_fraction_theta_full   0.992
_refine_diff_density_max    1.032
_refine_diff_density_min   -1.048
_refine_diff_density_rms    0.240

#=== END

data_ptbz-trans-(7)
 
_audit_creation_method            SHELXL-97 
_chemical_name_systematic 

;
 ?
;
 
 
_chemical_name_common             ? 
_chemical_melting_point           ? 
_chemical_formula_moiety    trans-[PtCl~2~(E-N(H)=C(SEt)CH~2~Ph)~2~
_chemical_formula_sum 
 'C20 H26 Cl2 N2 Pt S2' 
_chemical_formula_weight          624.54 
 
loop_ 
 _atom_type_symbol 
 _atom_type_description 
 _atom_type_scat_dispersion_real 
 _atom_type_scat_dispersion_imag 
 _atom_type_scat_source 
 'C'  'C'   0.0033   0.0016 
 'International Tables Vol C Tables 4.2.6.8 and 6.1.1.4' 
 'H'  'H'   0.0000   0.0000 
 'International Tables Vol C Tables 4.2.6.8 and 6.1.1.4' 
 'N'  'N'   0.0061   0.0033 
 'International Tables Vol C Tables 4.2.6.8 and 6.1.1.4' 
 'S'  'S'   0.1246   0.1234 
 'International Tables Vol C Tables 4.2.6.8 and 6.1.1.4' 
 'Cl'  'Cl'   0.1484   0.1585 
 'International Tables Vol C Tables 4.2.6.8 and 6.1.1.4' 
 'Pt'  'Pt'  -1.7033   8.3905 
 'International Tables Vol C Tables 4.2.6.8 and 6.1.1.4' 
 
_symmetry_cell_setting           triclinic
_symmetry_space_group_name_H-M    P-1 
 
loop_ 
 _symmetry_equiv_pos_as_xyz 
 'x, y, z' 
 '-x, -y, -z' 
 
_cell_length_a                    13.275(3) 
_cell_length_b                    13.337(3) 
_cell_length_c                    14.836(3) 
_cell_angle_alpha                 104.16(3) 
_cell_angle_beta                  94.14(2) 
_cell_angle_gamma                 109.02(3) 
_cell_volume                      2374.5(9) 
_cell_formula_units_Z             4 
_cell_measurement_temperature     293(2) 
_cell_measurement_reflns_used     ? 
_cell_measurement_theta_min       ? 
_cell_measurement_theta_max       ? 
 
_exptl_crystal_description        prism
_exptl_crystal_colour             yellow
_exptl_crystal_size_max           0.40
_exptl_crystal_size_mid           0.36
_exptl_crystal_size_min           0.18
_exptl_crystal_density_meas       ? 
_exptl_crystal_density_diffrn     1.747 
_exptl_crystal_density_method     'not measured' 
_exptl_crystal_F_000              1216 
_exptl_absorpt_coefficient_mu     6.318 
_exptl_absorpt_correction_type    psi-scan 
_exptl_absorpt_correction_T_min   0.3540 
_exptl_absorpt_correction_T_max   0.7720 
_exptl_absorpt_process_details   
'A. T. C. North, et al. Acta Cryst., A24 (1968) 351'

 
_exptl_special_details
;
 ?
;
 
 
_diffrn_ambient_temperature       293(2) 
_diffrn_radiation_wavelength      0.71073 
_diffrn_radiation_type            MoK\a 
_diffrn_radiation_source          'fine-focus sealed tube' 
_diffrn_radiation_monochromator   graphite 
_diffrn_measurement_device_type   'Philips PW1100' 
_diffrn_measurement_method        \Q/2\Q 
_diffrn_detector_area_resol_mean  ? 
_diffrn_standards_number          ? 
_diffrn_standards_interval_count  ? 
_diffrn_standards_interval_time   ? 
_diffrn_standards_decay_%         ? 
_diffrn_reflns_number             8719 
_diffrn_reflns_av_R_equivalents   0.0294 
_diffrn_reflns_av_sigmaI/netI     0.0360 
_diffrn_reflns_limit_h_min        -1 
_diffrn_reflns_limit_h_max        15 
_diffrn_reflns_limit_k_min        -15 
_diffrn_reflns_limit_k_max        14 
_diffrn_reflns_limit_l_min        -17 
_diffrn_reflns_limit_l_max        17 
_diffrn_reflns_theta_min          3.06 
_diffrn_reflns_theta_max          25.01 
_reflns_number_total              8318 
_reflns_number_gt                 7285 
_reflns_threshold_expression      >2sigma(I) 

_computing_data_collection        ?
_computing_cell_refinement        ?
_computing_data_reduction         ?
_computing_structure_solution     'SIR97 (Altomare et al. 1999)'
_computing_structure_refinement   'SHELXL-97 (Sheldrick, 1997)'
_computing_molecular_graphics     ?
_computing_publication_material   ?
 
 
_refine_special_details
;
 Refinement of F^2^ against ALL reflections.  The weighted R-factor wR and
 goodness of fit S are based on F^2^, conventional R-factors R are based
 on F, with F set to zero for negative F^2^. The threshold expression of
 F^2^ > 2sigma(F^2^) is used only for calculating R-factors(gt) etc. and is
 not relevant to the choice of reflections for refinement.  R-factors based
 on F^2^ are statistically about twice as large as those based on F, and R-
 factors based on ALL data will be even larger.
;
 
 
_refine_ls_structure_factor_coef  Fsqd
_refine_ls_matrix_type            full 
_refine_ls_weighting_scheme       calc  
_refine_ls_weighting_details 
 'calc w=1/[\s^2^(Fo^2^)+(0.0000P)^2^+27.6707P] where P=(Fo^2^+2Fc^2^)/3' 
_atom_sites_solution_primary      direct 
_atom_sites_solution_secondary    difmap 
_atom_sites_solution_hydrogens    geom 
_refine_ls_hydrogen_treatment     constr
_refine_ls_extinction_method      none
_refine_ls_extinction_coef        ?
_refine_ls_number_reflns          8318 
_refine_ls_number_parameters      492 
_refine_ls_number_restraints      0 
_refine_ls_R_factor_all           0.0696 
_refine_ls_R_factor_gt            0.0557 
_refine_ls_wR_factor_ref          0.1390 
_refine_ls_wR_factor_gt           0.1292 
_refine_ls_goodness_of_fit_ref    1.330 
_refine_ls_restrained_S_all       1.330 
_refine_ls_shift/su_max           0.001 
_refine_ls_shift/su_mean          0.000 
 
loop_
 _atom_site_label
 _atom_site_type_symbol
 _atom_site_fract_x
 _atom_site_fract_y
 _atom_site_fract_z
 _atom_site_U_iso_or_equiv
 _atom_site_adp_type
 _atom_site_occupancy
 _atom_site_symmetry_multiplicity
 _atom_site_calc_flag
 _atom_site_refinement_flags
 _atom_site_disorder_assembly
 _atom_site_disorder_group
Pt1 Pt 0.77181(4) 1.63145(4) 0.27480(3) 0.04734(15) Uani 1 1 d . . . 
Cl1 Cl 0.6135(3) 1.5550(3) 0.1677(2) 0.0693(9) Uani 1 1 d . . . 
Cl2 Cl 0.9299(3) 1.7071(3) 0.3822(2) 0.0617(8) Uani 1 1 d . . . 
N1 N 0.8502(8) 1.6258(9) 0.1631(7) 0.058(3) Uani 1 1 d . . . 
H1 H 0.8365 1.5602 0.1269 0.070 Uiso 1 1 calc R . . 
N2 N 0.6939(8) 1.6310(7) 0.3857(7) 0.054(2) Uani 1 1 d . . . 
H2 H 0.7038 1.5885 0.4180 0.064 Uiso 1 1 calc R . . 
S1 S 0.9693(4) 1.6813(4) 0.0312(3) 0.0892(13) Uani 1 1 d . . . 
S2 S 0.5772(3) 1.6817(3) 0.5197(3) 0.0652(9) Uani 1 1 d . . . 
C1 C 0.9169(12) 1.7027(12) 0.1367(10) 0.066(3) Uani 1 1 d . . . 
C2 C 0.8856(17) 1.5424(15) -0.0361(13) 0.101(6) Uani 1 1 d . . . 
H2A H 0.9208 1.5184 -0.0879 0.121 Uiso 1 1 calc R . . 
H2B H 0.8813 1.4940 0.0040 0.121 Uiso 1 1 calc R . . 
C3 C 0.7737(17) 1.5280(18) -0.0753(14) 0.116(7) Uani 1 1 d . . . 
H3A H 0.7385 1.5539 -0.0251 0.139 Uiso 1 1 calc R . . 
H3B H 0.7341 1.4511 -0.1062 0.139 Uiso 1 1 calc R . . 
H3C H 0.7764 1.5698 -0.1200 0.139 Uiso 1 1 calc R . . 
C4 C 0.9543(11) 1.8220(11) 0.1907(11) 0.073(4) Uani 1 1 d . . . 
H4A H 1.0288 1.8569 0.1840 0.088 Uiso 1 1 calc R . . 
H4B H 0.9530 1.8273 0.2569 0.088 Uiso 1 1 calc R . . 
C5 C 0.8893(10) 1.8859(10) 0.1615(8) 0.054(3) Uani 1 1 d . . . 
C6 C 0.9089(11) 1.9274(12) 0.0848(10) 0.071(4) Uani 1 1 d . . . 
H6 H 0.9603 1.9131 0.0494 0.085 Uiso 1 1 calc R . . 
C7 C 0.8517(12) 1.9903(12) 0.0610(10) 0.072(4) Uani 1 1 d . . . 
H7 H 0.8642 2.0181 0.0094 0.086 Uiso 1 1 calc R . . 
C8 C 0.7767(11) 2.0111(12) 0.1142(11) 0.072(4) Uani 1 1 d . . . 
H8 H 0.7407 2.0560 0.1002 0.086 Uiso 1 1 calc R . . 
C9 C 0.7540(13) 1.9670(13) 0.1873(11) 0.078(4) Uani 1 1 d . . . 
H9 H 0.7010 1.9793 0.2215 0.094 Uiso 1 1 calc R . . 
C10 C 0.8108(13) 1.9038(12) 0.2100(10) 0.076(4) Uani 1 1 d . . . 
H10 H 0.7951 1.8730 0.2594 0.091 Uiso 1 1 calc R . . 
C11 C 0.6315(9) 1.6835(9) 0.4170(8) 0.052(3) Uani 1 1 d . . . 
C12 C 0.6421(11) 1.6073(11) 0.5755(9) 0.062(3) Uani 1 1 d . . . 
H12A H 0.6254 1.5330 0.5347 0.075 Uiso 1 1 calc R . . 
H12B H 0.7199 1.6447 0.5874 0.075 Uiso 1 1 calc R . . 
C13 C 0.6002(12) 1.6026(13) 0.6690(10) 0.074(4) Uani 1 1 d . . . 
H13A H 0.6278 1.6752 0.7128 0.089 Uiso 1 1 calc R . . 
H13B H 0.6240 1.5531 0.6946 0.089 Uiso 1 1 calc R . . 
H13C H 0.5227 1.5766 0.6578 0.089 Uiso 1 1 calc R . . 
C14 C 0.6024(10) 1.7580(10) 0.3691(9) 0.059(3) Uani 1 1 d . . . 
H14A H 0.5267 1.7472 0.3699 0.071 Uiso 1 1 calc R . . 
H14B H 0.6118 1.7375 0.3037 0.071 Uiso 1 1 calc R . . 
C15 C 0.6694(11) 1.8810(10) 0.4137(9) 0.059(3) Uani 1 1 d . . . 
C16 C 0.6227(14) 1.9581(12) 0.4104(11) 0.078(4) Uani 1 1 d . . . 
H16 H 0.5509 1.9369 0.3831 0.093 Uiso 1 1 calc R . . 
C17 C 0.6884(19) 2.0725(14) 0.4504(13) 0.098(6) Uani 1 1 d . . . 
H17 H 0.6599 2.1271 0.4481 0.118 Uiso 1 1 calc R . . 
C18 C 0.7922(19) 2.1009(13) 0.4918(12) 0.099(6) Uani 1 1 d . . . 
H18 H 0.8337 2.1753 0.5188 0.119 Uiso 1 1 calc R . . 
C19 C 0.8357(14) 2.0253(12) 0.4945(11) 0.082(5) Uani 1 1 d . . . 
H19 H 0.9071 2.0465 0.5230 0.099 Uiso 1 1 calc R . . 
C20 C 0.7746(11) 1.9143(11) 0.4548(10) 0.065(3) Uani 1 1 d . . . 
H20 H 0.8059 1.8615 0.4562 0.078 Uiso 1 1 calc R . . 
Pt2 Pt 0.75471(3) 1.36377(3) 0.25001(3) 0.04432(15) Uani 1 1 d . . . 
Cl3 Cl 0.8248(3) 1.3502(3) 0.1120(2) 0.0676(8) Uani 1 1 d . . . 
Cl4 Cl 0.6822(2) 1.3701(3) 0.3870(2) 0.0609(8) Uani 1 1 d . . . 
N3 N 0.6049(7) 1.3065(8) 0.1729(7) 0.054(2) Uani 1 1 d . . . 
H3 H 0.5850 1.3552 0.1560 0.065 Uiso 1 1 calc R . . 
N4 N 0.9049(7) 1.4302(7) 0.3264(7) 0.047(2) Uani 1 1 d . . . 
H4 H 0.9300 1.5012 0.3470 0.057 Uiso 1 1 calc R . . 
S3 S 0.4121(3) 1.1685(3) 0.0723(3) 0.0711(10) Uani 1 1 d . . . 
S4 S 1.0969(3) 1.4504(3) 0.4155(3) 0.0717(10) Uani 1 1 d . . . 
C21 C 0.5363(9) 1.2084(9) 0.1462(8) 0.048(3) Uani 1 1 d . . . 
C22 C 0.4236(12) 1.2838(13) 0.0260(12) 0.083(5) Uani 1 1 d . . . 
H22A H 0.3535 1.2731 -0.0072 0.100 Uiso 1 1 calc R . . 
H22B H 0.4447 1.3509 0.0780 0.100 Uiso 1 1 calc R . . 
C23 C 0.5044(16) 1.2979(17) -0.0397(14) 0.107(6) Uani 1 1 d . . . 
H23A H 0.5739 1.3084 -0.0072 0.129 Uiso 1 1 calc R . . 
H23B H 0.5088 1.3612 -0.0613 0.129 Uiso 1 1 calc R . . 
H23C H 0.4822 1.2330 -0.0927 0.129 Uiso 1 1 calc R . . 
C24 C 0.5541(10) 1.1137(11) 0.1734(11) 0.067(4) Uani 1 1 d . . . 
H24A H 0.5776 1.0720 0.1213 0.080 Uiso 1 1 calc R . . 
H24B H 0.6125 1.1436 0.2267 0.080 Uiso 1 1 calc R . . 
C25 C 0.4588(9) 1.0355(9) 0.1989(9) 0.052(3) Uani 1 1 d . . . 
C26 C 0.3965(14) 0.9385(12) 0.1338(13) 0.089(5) Uani 1 1 d . . . 
H26 H 0.4135 0.9189 0.0739 0.107 Uiso 1 1 calc R . . 
C27 C 0.3022(16) 0.8665(14) 0.1614(18) 0.113(7) Uani 1 1 d . . . 
H27 H 0.2555 0.8014 0.1185 0.135 Uiso 1 1 calc R . . 
C28 C 0.2844(17) 0.898(2) 0.255(2) 0.112(8) Uani 1 1 d . . . 
H28 H 0.2280 0.8522 0.2758 0.135 Uiso 1 1 calc R . . 
C29 C 0.3488(18) 0.9956(19) 0.3126(16) 0.104(6) Uani 1 1 d . . . 
H29 H 0.3340 1.0182 0.3730 0.125 Uiso 1 1 calc R . . 
C30 C 0.4337(13) 1.0611(14) 0.2867(10) 0.075(4) Uani 1 1 d . . . 
H30 H 0.4776 1.1270 0.3303 0.089 Uiso 1 1 calc R . . 
C31 C 0.9685(8) 1.3823(9) 0.3488(8) 0.048(3) Uani 1 1 d . . . 
C32 C 1.1301(10) 1.5894(9) 0.4134(10) 0.058(3) Uani 1 1 d . . . 
H32A H 1.0704 1.6132 0.4296 0.070 Uiso 1 1 calc R . . 
H32B H 1.1926 1.6352 0.4615 0.070 Uiso 1 1 calc R . . 
C33 C 1.1536(19) 1.6079(16) 0.3232(16) 0.125(8) Uani 1 1 d . . . 
H33A H 1.2228 1.6028 0.3139 0.150 Uiso 1 1 calc R . . 
H33B H 1.1546 1.6801 0.3229 0.150 Uiso 1 1 calc R . . 
H33C H 1.0989 1.5529 0.2734 0.150 Uiso 1 1 calc R . . 
C34 C 0.9338(10) 1.2585(9) 0.3212(11) 0.064(4) Uani 1 1 d . . . 
H34A H 0.9113 1.2333 0.3751 0.077 Uiso 1 1 calc R . . 
H34B H 0.8713 1.2279 0.2715 0.077 Uiso 1 1 calc R . . 
C35 C 1.0184(9) 1.2137(9) 0.2879(8) 0.047(3) Uani 1 1 d . . . 
C36 C 1.0576(12) 1.2283(11) 0.2082(10) 0.068(4) Uani 1 1 d . . . 
H36 H 1.0306 1.2660 0.1734 0.081 Uiso 1 1 calc R . . 
C37 C 1.1366(13) 1.1884(12) 0.1776(11) 0.077(4) Uani 1 1 d . . . 
H37 H 1.1640 1.2020 0.1241 0.093 Uiso 1 1 calc R . . 
C38 C 1.1742(11) 1.1302(11) 0.2243(11) 0.072(4) Uani 1 1 d . . . 
H38 H 1.2263 1.1018 0.2028 0.087 Uiso 1 1 calc R . . 
C39 C 1.1344(12) 1.1132(12) 0.3048(10) 0.071(4) Uani 1 1 d . . . 
H39 H 1.1595 1.0726 0.3376 0.085 Uiso 1 1 calc R . . 
C40 C 1.0577(11) 1.1557(10) 0.3371(9) 0.060(3) Uani 1 1 d . . . 
H40 H 1.0327 1.1452 0.3923 0.073 Uiso 1 1 calc R . . 
 
loop_ 
 _atom_site_aniso_label 
 _atom_site_aniso_U_11 
 _atom_site_aniso_U_22 
 _atom_site_aniso_U_33 
 _atom_site_aniso_U_23 
 _atom_site_aniso_U_13 
 _atom_site_aniso_U_12 
Pt1 0.0516(3) 0.0435(3) 0.0521(3) 0.01239(19) 0.0104(2) 0.0241(2) 
Cl1 0.069(2) 0.067(2) 0.068(2) 0.0099(16) -0.0086(16) 0.0309(17) 
Cl2 0.0579(17) 0.0628(18) 0.0633(18) 0.0105(15) 0.0023(14) 0.0270(15) 
N1 0.065(6) 0.053(6) 0.066(6) 0.017(5) 0.021(5) 0.031(5) 
N2 0.066(6) 0.039(5) 0.064(6) 0.020(4) 0.018(5) 0.023(5) 
S1 0.111(3) 0.090(3) 0.088(3) 0.035(2) 0.054(3) 0.048(3) 
S2 0.064(2) 0.0612(19) 0.077(2) 0.0147(17) 0.0292(17) 0.0307(16) 
C1 0.072(9) 0.073(9) 0.074(9) 0.026(7) 0.027(7) 0.044(8) 
C2 0.132(17) 0.108(14) 0.084(12) 0.028(10) 0.051(12) 0.062(13) 
C3 0.115(16) 0.130(17) 0.090(13) 0.035(12) 0.030(12) 0.022(13) 
C4 0.059(8) 0.069(9) 0.092(10) 0.026(8) 0.026(7) 0.018(7) 
C5 0.054(7) 0.055(7) 0.049(7) 0.018(5) 0.007(5) 0.011(6) 
C6 0.065(9) 0.076(9) 0.078(9) 0.022(8) 0.025(7) 0.031(7) 
C7 0.078(9) 0.079(9) 0.068(9) 0.040(8) 0.020(7) 0.025(8) 
C8 0.056(8) 0.069(9) 0.081(10) 0.004(7) 0.010(7) 0.023(7) 
C9 0.088(11) 0.077(10) 0.078(10) 0.013(8) 0.040(8) 0.039(9) 
C10 0.090(11) 0.073(9) 0.064(9) 0.022(7) 0.026(8) 0.025(8) 
C11 0.038(6) 0.049(6) 0.062(7) 0.004(5) 0.019(5) 0.014(5) 
C12 0.060(8) 0.058(7) 0.072(8) 0.025(6) 0.023(6) 0.018(6) 
C13 0.070(9) 0.081(10) 0.067(9) 0.022(8) 0.016(7) 0.020(8) 
C14 0.057(7) 0.055(7) 0.066(8) 0.011(6) 0.009(6) 0.026(6) 
C15 0.075(9) 0.053(7) 0.054(7) 0.014(6) 0.026(6) 0.027(6) 
C16 0.103(12) 0.068(9) 0.083(10) 0.025(8) 0.017(9) 0.053(9) 
C17 0.17(2) 0.068(10) 0.100(13) 0.045(10) 0.042(13) 0.071(12) 
C18 0.148(19) 0.053(9) 0.083(12) 0.025(8) 0.005(12) 0.019(11) 
C19 0.098(12) 0.060(9) 0.073(10) 0.021(7) 0.013(8) 0.005(8) 
C20 0.064(8) 0.052(7) 0.071(9) 0.017(6) 0.011(7) 0.009(6) 
Pt2 0.0379(2) 0.0452(3) 0.0496(3) 0.01012(19) 0.00324(18) 0.01778(18) 
Cl3 0.066(2) 0.081(2) 0.0600(18) 0.0183(16) 0.0227(15) 0.0310(17) 
Cl4 0.0539(17) 0.076(2) 0.0548(17) 0.0181(15) 0.0091(13) 0.0260(15) 
N3 0.043(5) 0.061(6) 0.058(6) 0.009(5) -0.004(4) 0.028(5) 
N4 0.032(4) 0.037(5) 0.065(6) 0.002(4) 0.001(4) 0.012(4) 
S3 0.0455(17) 0.072(2) 0.085(2) 0.0174(19) -0.0105(16) 0.0146(16) 
S4 0.0500(18) 0.0522(18) 0.104(3) 0.0145(18) -0.0144(18) 0.0182(15) 
C21 0.044(6) 0.043(6) 0.056(7) 0.010(5) 0.006(5) 0.016(5) 
C22 0.064(9) 0.084(10) 0.099(12) 0.028(9) -0.014(8) 0.027(8) 
C23 0.109(15) 0.118(15) 0.112(15) 0.059(12) -0.003(12) 0.047(12) 
C24 0.052(7) 0.062(8) 0.091(10) 0.023(7) 0.011(7) 0.025(6) 
C25 0.050(6) 0.046(6) 0.061(7) 0.013(5) 0.001(5) 0.022(5) 
C26 0.093(12) 0.050(8) 0.110(13) 0.010(8) 0.025(10) 0.015(8) 
C27 0.093(14) 0.063(10) 0.16(2) 0.029(12) -0.023(13) 0.006(9) 
C28 0.093(14) 0.112(16) 0.18(2) 0.096(17) 0.081(15) 0.052(13) 
C29 0.118(16) 0.111(15) 0.133(17) 0.074(14) 0.051(14) 0.068(14) 
C30 0.085(11) 0.084(10) 0.066(9) 0.022(8) 0.013(8) 0.044(9) 
C31 0.030(5) 0.040(6) 0.066(7) 0.001(5) 0.006(5) 0.013(4) 
C32 0.045(6) 0.044(6) 0.076(9) 0.015(6) -0.003(6) 0.008(5) 
C33 0.143(19) 0.088(13) 0.16(2) 0.047(14) 0.064(16) 0.045(13) 
C34 0.043(6) 0.044(6) 0.111(11) 0.025(7) 0.015(7) 0.021(5) 
C35 0.043(6) 0.040(6) 0.053(7) 0.015(5) 0.002(5) 0.009(5) 
C36 0.082(10) 0.064(8) 0.067(8) 0.021(7) 0.006(7) 0.039(7) 
C37 0.084(10) 0.074(9) 0.076(10) 0.016(8) 0.025(8) 0.032(8) 
C38 0.059(8) 0.058(8) 0.096(11) 0.007(8) 0.015(8) 0.027(7) 
C39 0.077(9) 0.077(9) 0.073(9) 0.025(7) 0.018(7) 0.043(8) 
C40 0.066(8) 0.055(7) 0.063(8) 0.015(6) 0.011(6) 0.026(6) 
 
_geom_special_details 
; 
 All esds (except the esd in the dihedral angle between two l.s. planes) 
 are estimated using the full covariance matrix.  The cell esds are taken 
 into account individually in the estimation of esds in distances, angles 
 and torsion angles; correlations between esds in cell parameters are only 
 used when they are defined by crystal symmetry.  An approximate (isotropic) 
 treatment of cell esds is used for estimating esds involving l.s. planes. 
; 
 
loop_ 
 _geom_bond_atom_site_label_1 
 _geom_bond_atom_site_label_2 
 _geom_bond_distance 
 _geom_bond_site_symmetry_2 
 _geom_bond_publ_flag 
Pt1 N2 2.006(10) . ? 
Pt1 N1 2.018(10) . ? 
Pt1 Cl1 2.304(3) . ? 
Pt1 Cl2 2.305(3) . ? 
N1 C1 1.282(17) . ? 
N2 C11 1.291(14) . ? 
S1 C1 1.755(14) . ? 
S1 C2 1.80(2) . ? 
S2 C11 1.733(12) . ? 
S2 C12 1.809(13) . ? 
C1 C4 1.492(19) . ? 
C2 C3 1.49(3) . ? 
C4 C5 1.505(19) . ? 
C5 C10 1.358(19) . ? 
C5 C6 1.388(18) . ? 
C6 C7 1.387(19) . ? 
C7 C8 1.371(19) . ? 
C8 C9 1.36(2) . ? 
C9 C10 1.38(2) . ? 
C11 C14 1.483(17) . ? 
C12 C13 1.539(17) . ? 
C14 C15 1.533(17) . ? 
C15 C20 1.363(19) . ? 
C15 C16 1.372(18) . ? 
C16 C17 1.43(2) . ? 
C17 C18 1.36(3) . ? 
C18 C19 1.32(2) . ? 
C19 C20 1.385(18) . ? 
Pt2 N4 2.019(8) . ? 
Pt2 N3 2.025(9) . ? 
Pt2 Cl3 2.301(3) . ? 
Pt2 Cl4 2.306(3) . ? 
N3 C21 1.271(14) . ? 
N4 C31 1.283(14) . ? 
S3 C21 1.756(11) . ? 
S3 C22 1.800(16) . ? 
S4 C31 1.736(11) . ? 
S4 C32 1.769(12) . ? 
C21 C24 1.498(16) . ? 
C22 C23 1.50(2) . ? 
C24 C25 1.494(17) . ? 
C25 C30 1.357(18) . ? 
C25 C26 1.366(18) . ? 
C26 C27 1.46(3) . ? 
C27 C28 1.41(3) . ? 
C28 C29 1.33(3) . ? 
C29 C30 1.33(2) . ? 
C31 C34 1.501(15) . ? 
C32 C33 1.46(2) . ? 
C34 C35 1.495(16) . ? 
C35 C36 1.359(18) . ? 
C35 C40 1.374(16) . ? 
C36 C37 1.379(19) . ? 
C37 C38 1.34(2) . ? 
C38 C39 1.38(2) . ? 
C39 C40 1.379(18) . ? 
 
loop_ 
 _geom_angle_atom_site_label_1 
 _geom_angle_atom_site_label_2 
 _geom_angle_atom_site_label_3 
 _geom_angle 
 _geom_angle_site_symmetry_1 
 _geom_angle_site_symmetry_3 
 _geom_angle_publ_flag 
N2 Pt1 N1 177.7(4) . . ? 
N2 Pt1 Cl1 93.0(3) . . ? 
N1 Pt1 Cl1 87.0(3) . . ? 
N2 Pt1 Cl2 86.8(3) . . ? 
N1 Pt1 Cl2 93.1(3) . . ? 
Cl1 Pt1 Cl2 179.70(13) . . ? 
C1 N1 Pt1 131.4(9) . . ? 
C11 N2 Pt1 131.1(9) . . ? 
C1 S1 C2 104.3(8) . . ? 
C11 S2 C12 104.0(6) . . ? 
N1 C1 C4 123.1(12) . . ? 
N1 C1 S1 124.4(11) . . ? 
C4 C1 S1 112.4(11) . . ? 
C3 C2 S1 115.5(14) . . ? 
C1 C4 C5 115.2(12) . . ? 
C10 C5 C6 119.2(13) . . ? 
C10 C5 C4 120.4(12) . . ? 
C6 C5 C4 120.4(12) . . ? 
C7 C6 C5 120.0(13) . . ? 
C8 C7 C6 119.2(14) . . ? 
C9 C8 C7 121.2(15) . . ? 
C8 C9 C10 119.0(14) . . ? 
C5 C10 C9 121.3(14) . . ? 
N2 C11 C14 122.2(11) . . ? 
N2 C11 S2 125.6(10) . . ? 
C14 C11 S2 112.1(8) . . ? 
C13 C12 S2 108.1(9) . . ? 
C11 C14 C15 113.9(11) . . ? 
C20 C15 C16 119.9(13) . . ? 
C20 C15 C14 121.0(12) . . ? 
C16 C15 C14 119.1(13) . . ? 
C15 C16 C17 117.7(16) . . ? 
C18 C17 C16 119.9(15) . . ? 
C19 C18 C17 121.5(16) . . ? 
C18 C19 C20 119.7(18) . . ? 
C15 C20 C19 121.3(15) . . ? 
N4 Pt2 N3 176.5(4) . . ? 
N4 Pt2 Cl3 90.8(3) . . ? 
N3 Pt2 Cl3 88.9(3) . . ? 
N4 Pt2 Cl4 90.0(3) . . ? 
N3 Pt2 Cl4 90.5(3) . . ? 
Cl3 Pt2 Cl4 177.82(12) . . ? 
C21 N3 Pt2 129.0(8) . . ? 
C31 N4 Pt2 129.7(7) . . ? 
C21 S3 C22 104.4(6) . . ? 
C31 S4 C32 104.6(6) . . ? 
N3 C21 C24 123.1(11) . . ? 
N3 C21 S3 124.1(9) . . ? 
C24 C21 S3 112.7(8) . . ? 
C23 C22 S3 112.6(12) . . ? 
C25 C24 C21 116.0(10) . . ? 
C30 C25 C26 119.9(14) . . ? 
C30 C25 C24 120.0(13) . . ? 
C26 C25 C24 120.1(13) . . ? 
C25 C26 C27 118.0(17) . . ? 
C28 C27 C26 118.0(17) . . ? 
C29 C28 C27 119.4(18) . . ? 
C30 C29 C28 122(2) . . ? 
C29 C30 C25 122.5(17) . . ? 
N4 C31 C34 121.1(10) . . ? 
N4 C31 S4 124.8(8) . . ? 
C34 C31 S4 114.1(8) . . ? 
C33 C32 S4 114.4(11) . . ? 
C35 C34 C31 114.8(10) . . ? 
C36 C35 C40 118.3(12) . . ? 
C36 C35 C34 121.1(11) . . ? 
C40 C35 C34 120.6(11) . . ? 
C35 C36 C37 121.5(13) . . ? 
C38 C37 C36 120.6(15) . . ? 
C37 C38 C39 118.8(13) . . ? 
C40 C39 C38 120.7(13) . . ? 
C35 C40 C39 120.0(13) . . ? 
 
_diffrn_measured_fraction_theta_max    0.992 
_diffrn_reflns_theta_full              25.01 
_diffrn_measured_fraction_theta_full   0.992 
_refine_diff_density_max    0.945 
_refine_diff_density_min   -1.038 
_refine_diff_density_rms    0.164 

#=== END
